# Supplementary material for: Application of a Two-Dimensional Mapping-Based Visualization Technique: Nutrient-Value-Based Food Grouping
Source: MDPI journal article supplement (doi:10.3390/nu15235006), 2023-12-04
Supplement: s1 [file s1]

## Supplementary Materials

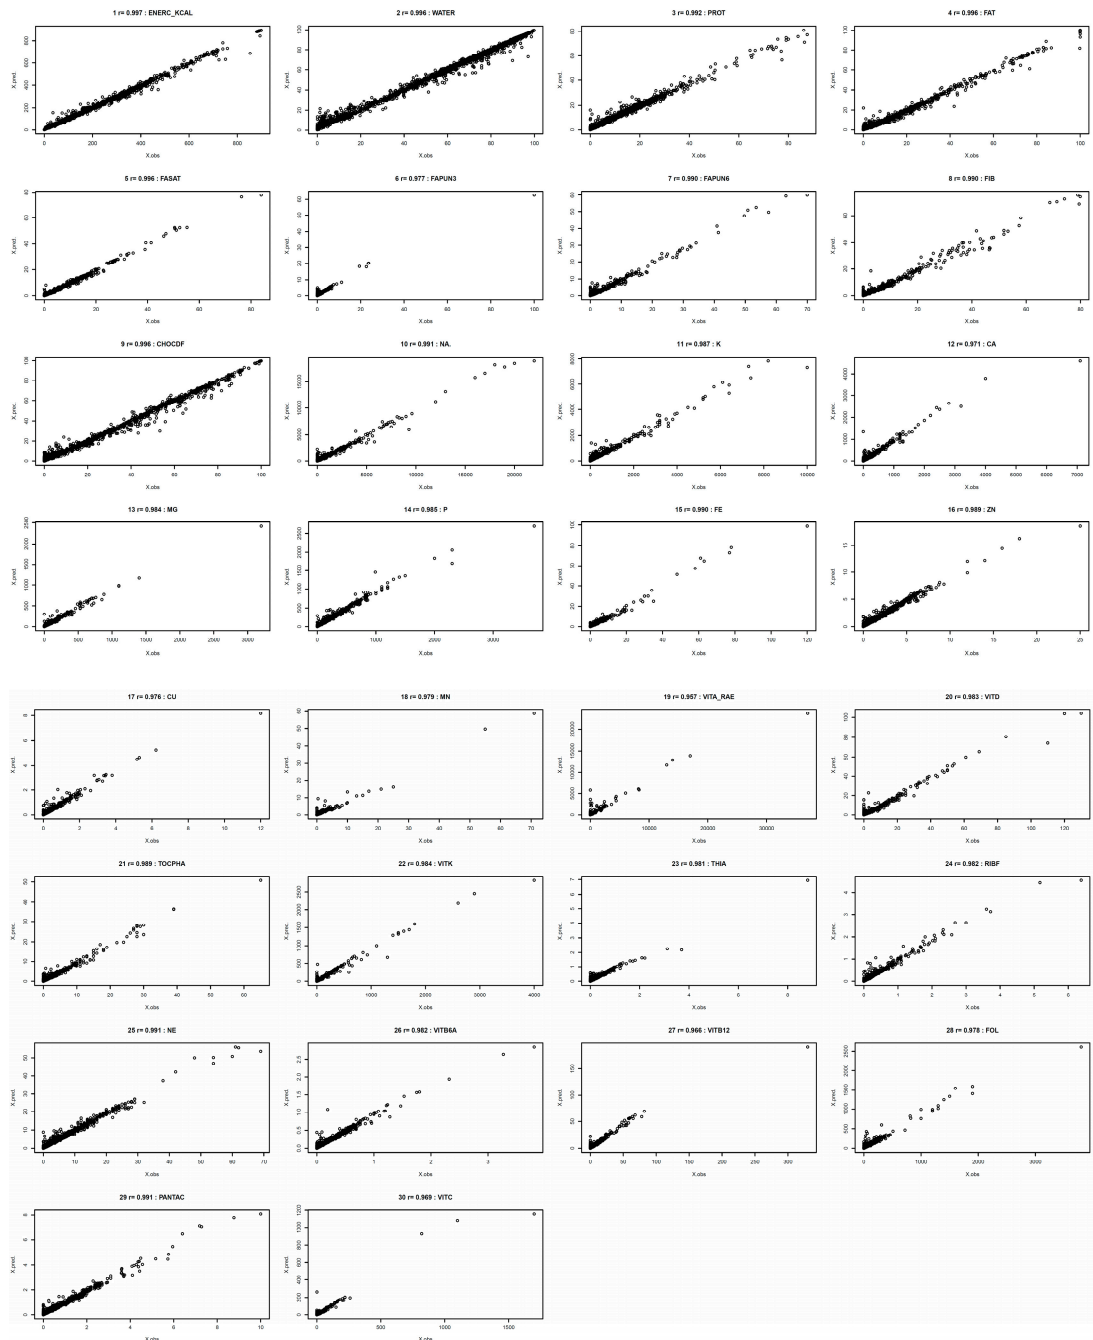

**Supplementary Figure S1.** Accuracy of the imputed data. The  $x$ -axis represents the actual value, and the  $y$ -axis represents the predicted value. For all nutrients, the correlation coefficients between the actual and predicted values were greater than 0.9. The abbreviations are following; ENERC\_KCAL: energy, WATER: water, PROT: protein, FAT: fat, FASAT: saturated fatty acid, FAPUN3: n-3 polyunsaturated fatty acid, FAPUN6: n-6 polyunsaturated fatty acid, FIB: dietary fiber, CHOCDF: carbohydrate, NA: sodium, K: potassium, CA: calcium, MG: magnesium, P: phosphorus, FE: iron, ZN: zinc, CU: copper, MN: manganese, VITA\_RAE: vitamin A (retinol activity equivalents), VITD: vitamin D, TOCPHA: vitamin E (alpha-tocopherol), VITK: vitamin K, THIA: vitamin B<sub>1</sub>, RIBF: vitamin B<sub>2</sub>, NE: niacin equivalent, VITB6A: vitamin B<sub>6</sub>, VITB12: vitamin B<sub>12</sub>, FOL: folic acid, PANTAC: pantothenic acid, VITC: vitamin C.
